# Supplementary material for: Bovine Dialyzable Leukocyte Extract IMMUNEPOTENT CRP: Evaluation of Biological Activity of the Modified Product
Source: MDPI journal article supplement (doi:10.3390/app11083505), 2021-04-14
Supplement: s1 [file s1]

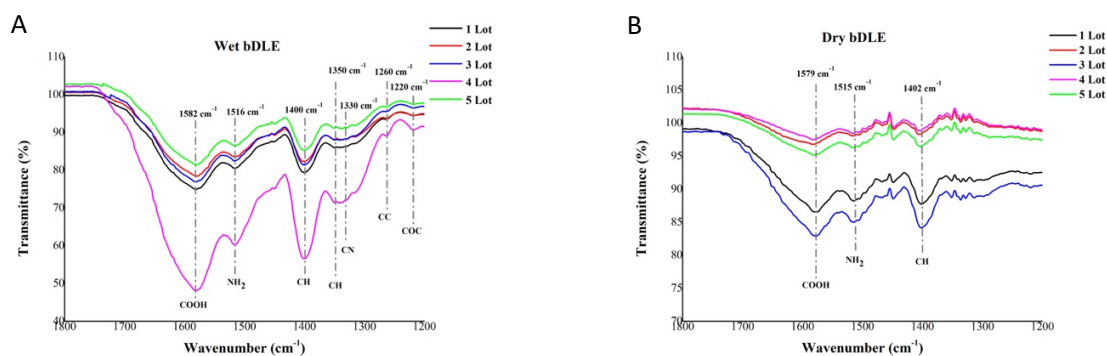

**Supplementary figure 1.** IR spectrum of wet and dry bDLB. **(A)** IR spectrum of dry bDLB showed three characteristics peaks in all lots produced at 1579 cm<sup>-1</sup> (COOH), 1515 cm<sup>-1</sup> (NH<sub>2</sub>) and 1402 cm<sup>-1</sup> (CH). **(B)** IR spectrum of wet bDLB showed seven characteristics peaks in all lots produced at 1582 cm<sup>-1</sup> (COOH), 1516 cm<sup>-1</sup> (NH<sub>2</sub>), 1400 cm<sup>-1</sup> and 1350 cm<sup>-1</sup> (CH), 1330 cm<sup>-1</sup> (CN), 1260 cm<sup>-1</sup> (CC), and 1220 cm<sup>-1</sup> (COC).
